# Supplementary material
Source: publisher figshare collection journal article supplement (https://aacr.figshare.com/articles/dataset/_/22423949)
Supplement: Supplementary file 1 [file 39870197]

## **SUPPLEMENTARY DATA**

### **The EMT transcription factor ZEB2 promotes proliferation of primary and metastatic melanoma while suppressing an invasive, mesenchymal-like phenotype**

Niels Vandamme<sup>1,2,3,#</sup>, Geertrui Denecker<sup>1,2,#</sup>, Kenneth Bruneel<sup>1,2</sup>, Gillian Blancke<sup>1,2</sup>, Özden Akay<sup>1,2,3,6,7</sup>, Joachim Taminau<sup>1,2</sup>, Jordy De Coninck<sup>1,2</sup>, Eva De Smedt<sup>1,2</sup>, Nicolas Skrypek<sup>1,2</sup>, Wouter Van Looke<sup>2,4</sup>, Jasper Wouters<sup>5</sup>, David Nittner<sup>6,7</sup>, Corinna Köhler<sup>6,7</sup>, Douglas S. Darling<sup>8</sup>, Phil Cheng<sup>9</sup>, Marieke Raaijmakers<sup>9</sup>, Mitchell Levesque<sup>9</sup>, Udupi Girish Mallya<sup>10,11F</sup>, Mairin Rafferty<sup>11</sup>, Balazs Balint<sup>11</sup>, William M. Gallagher<sup>10,11</sup>, Lieve Brochez<sup>12</sup>, Danny Huylebroeck<sup>13,14</sup>, Jody Haigh<sup>15,16</sup>, Vanessa Andries<sup>2</sup>, Florian Rambow<sup>6,7</sup>, Pieter Van Vlierberghe<sup>2,4</sup>, Steven Goossens<sup>1,2,4</sup>, Joost van den Oord<sup>5</sup>, Jean-Christophe Marine<sup>6,7</sup> and Geert Berx<sup>1,2,\*</sup>

# Share equal contributions.

\*Corresponding author: Prof. Geert Berx  
Molecular and Cellular Oncology Lab  
Cancer Research Institute Ghent, Ghent University  
Technologiepark-Zwijnaarde 71, B-9052 Ghent  
Tel: +32-9-3313650  
E-mail: **Geert.Berx@ugent.be**

## Supplementary Figure Legends

**Supplementary Figure S1. Zeb2-wildtype cells outcompete Zeb2-negative cells in terms of expansion and differentiation.** (A) Morphological appearance of the mice and skins of Tyr::NRAS<sup>Q61K</sup> p53<sup>fl/fl</sup> Zeb2<sup>fl/fl</sup> mice and their wildtype controls. (B) Hematoxylin-eosin (H&E) staining (left) and immunostaining against Zeb2 (right) on sections isolated from indicated skin regions. For Zeb2 immunostaining, sections were depigmented via peroxide-bleaching.

**Supplementary Figure S2. Zeb2 does not accelerate melanoma development on a p53-wildtype background.** (A) Induced transgenic ZEB2 expression upon Cre activation. (B) Kaplan-Meier tumour-free survival curves for Tyr::NRAS<sup>Q61K</sup> Rosa26-Zeb2 mice and their wildtype controls. Tumor-free percentages were compared using the Log-Rank (Mantel-Cox) test.

**Supplementary Figure S3. ZEB2 affects the phenotypical switch between proliferation and invasion in mouse and human melanoma cells.** (A) Relative proliferation after Zeb2 knockdown in primary melanoma cell lines established from five different NRAS<sup>Q61K</sup> Rosa-Zeb2 mice (Mel1 to Mel5) and B16 melanoma cells. (B) Differential expression of melanoma phenotype-specific genes after siZeb2 depletion of B16 cells, determined via q-RT-PCR and normalised to the median of the expression levels and represented in a simplified bar chart. (C-D) Relative invasion and/or migration of B16 melanoma cells after knockdown of Zeb2 or Mitf, or after Zeb1 induction. (E) Top: Schematic diagram of an in vitro extravasation assay. Bottom: Human HUVEC cells are used as endothelial monolayer and challenged with B16 iZeb1 cells. (F) Immunoblot analysis confirming Zeb1 induction or knockdown in Lu1205 cells, below relative invasion measurements in a transwell invasion assay. Data (panel A,C,D,F) are compared by using unpaired Student's t-test and are presented as means $\pm$  95%SD. P-values are indicated with \*\*\*P<0.005, \*\*P<0.05 and \*P<0.01. (G) *Left*: Log<sub>2</sub>(fold change) expression values of differentially expressed phenotype-specific genes in 501 melanoma cells after ZEB modulation. Differential expression determined via q-RT-PCR and analysed in qBase+, normalized to the median of the expression levels and represented in a heat-map. Pro: Proliferative gene signature, Inv: Invasive gene signature. *Right*: Relative proliferation of ZEB1-induced 501MEL melanoma cells measured via SRB assay, data are represented as mean+SEM and compared using Two-way ANOVA, post-hoc Tukey' HSD. (H) Boyden-Chamber measurements of migration in presence of the proliferation blocker

aphidicolin (1.6µg/ml) of ZEB1-inducible human melanoma cell lines 501MEL and SK-MEL28. Error bars represent SD and means of repeats were compared with a Student's t test. (I) Immunoblot analysis of the respective cell lines 72h after doxycycline administration.

**Supplementary Figure S4. ZEB2 affects the phenotypical switch between proliferation and invasion in human melanoma.**

(A) Immunoblot analysis of ZEB2, MITF and ZEB1 in SK-MEL28 cells transduced with lentiviral vector expressing doxycyclin-inducible shRNA (sh1) directed against ZEB2. Cells in withdrawal condition were treated with doxycyclin for 7 days and subsequently doxycyclin was washed away and omitted for 11 consecutive days. (B) Immunoblot analysis of ZEB2, MITF and ZEB1 in SK-MEL28 cells transduced with a second independent lentiviral vectors expressing a doxycyclin-inducible shRNA directed against ZEB2 (sh2-ZEB2). (C) Left: images of colony formation in doxycyclin-induced SK-MEL28 cells (sh2-ZEB2) and Mel501 cells (sh1-ZEB2 and sh2-ZEB2). Cells were untreated (-DOX) or pre-treated (+DOX) with doxycyclin and grown in soft agar in the absence (-DOX) or presence (+DOX) of doxycyclin. After 15 days, cell colonies were imaged using an inverted microscope. Right: Relative proliferation after ZEB2 knockdown in the respective melanoma cells measured via SRB assay. Data are represented as mean+SEM and compared using Two-way ANOVA, post-hoc Tukey' HSD. (D) Relative proliferation measured via SRB assay of 501MEL melanoma cells with rescue and complementation settings with RNAi-mediated knockdown and cDNA expression vectors. Equimolar siRNA concentrations were used for all settings. Data were compared by using Student's t-test and presented as averages+SD. P-values are indicated with \*\*\*P<0.001, \*\*P<0.01 and \*P<0.05. (E) Log2(fold change) mRNA expression for cultures used in panel D.

**Supplementary Figure S5. TGF-β treatment mediates the switch from ZEB2 to ZEB1 and induces an invasive gene signature.**

Differential gene expression of phenotype-specific genes is determined via q-RT-PCR, normalized to the timepoint zero. Data were compared by using Student's t-test and presented as averages+SD. P-values are indicated with \*\*\*P<0.001, \*\*P<0.01 and \*P<0.05.
